# Supplementary material for: Exploring the permeability of covid-19 drugs within the cellular membrane: a molecular dynamics simulation study
Source: Royal Society of Chemistry journal article supplement (doi:10.1039/d1cp05550j), 2022-01-01
Supplement: d1cp05550j1.pdf [file d1cp05550j1.pdf]

## Electronic Supplementary Information

### Exploring the Permeability of Covid-19 Drugs within the Cellular Membrane: A Molecular Dynamics Simulation Study

Tahereh Ghaed-Sharaf,<sup>a</sup> Akbar Omidvar<sup>a\*</sup>

<sup>a</sup> Faculty of Chemistry, Department of Physical Chemistry, University of Isfahan, 81746-73441 Isfahan, Iran

**\*Corresponding Author**

**Akbar Omidvar**

ORCID: 0000-0003-4691-4564

E-mail: [a.omidvar@chem.ui.ac.ir](mailto:a.omidvar@chem.ui.ac.ir)

Phone: +98-3137934924

Fax: +98-3136689732

**Table S1.** Atomic charges of FAV-Keto.

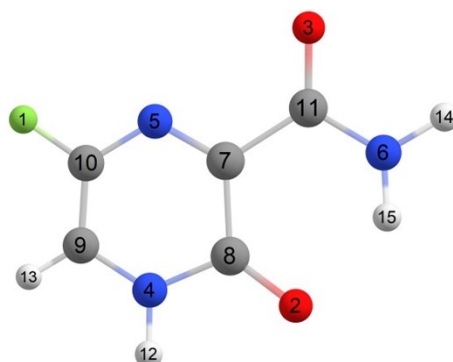

| Atoms | Atomic Number | Atomic Charge |
|-------|---------------|---------------|
| F     | 1             | -0.33827000   |
| O     | 2             | -0.57101000   |
| O     | 3             | -0.57192000   |
| N     | 4             | -0.54480000   |
| N     | 5             | -0.44040000   |
| N     | 6             | -0.79722000   |
| C     | 7             | 0.10433000    |
| C     | 8             | 0.59767000    |
| C     | 9             | -0.01327000   |
| C     | 10            | 0.50740000    |
| C     | 11            | 0.62477000    |
| H     | 12            | 0.41640000    |
| H     | 13            | 0.22589000    |
| H     | 14            | 0.39643000    |
| H     | 15            | 0.40401000    |

**Table S2.** Atomic charges of FAV- Enol.

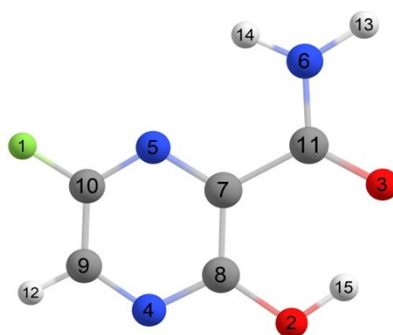

| Atoms | Atomic Number | Atomic Charge |
|-------|---------------|---------------|
| F     | 1             | -0.33719000   |
| O     | 2             | -0.64678000   |
| O     | 3             | -0.65867000   |
| N     | 4             | -0.42363000   |
| N     | 5             | -0.44815000   |
| N     | 6             | -0.76980000   |
| C     | 7             | 0.01505000    |
| C     | 8             | 0.52983000    |
| C     | 9             | 0.01074000    |
| C     | 10            | 0.55168000    |
| C     | 11            | 0.63837000    |
| H     | 12            | 0.20939000    |
| H     | 13            | 0.40401000    |
| H     | 14            | 0.41654000    |
| H     | 15            | 0.50861000    |

**Table S3.** Atomic charges of Hydroxychloroquine.

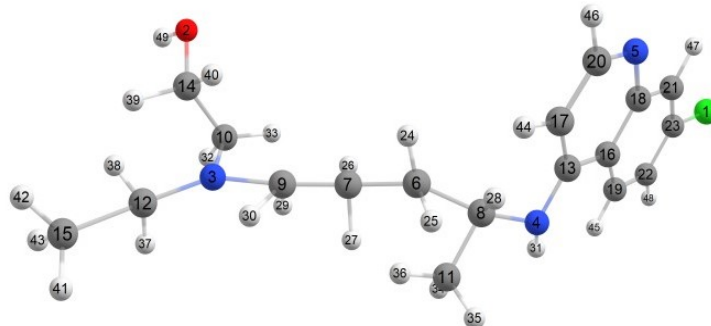

| Atoms | Atomic Number | Atomic Charge |
|-------|---------------|---------------|
| Cl    | 1             | -0.00360000   |
| O     | 2             | -0.73023000   |
| N     | 3             | -0.58615000   |
| N     | 4             | -0.61507000   |
| N     | 5             | -0.52322000   |
| C     | 6             | -0.40076000   |
| C     | 7             | -0.39499000   |
| C     | 8             | -0.01196000   |
| C     | 9             | -0.15595000   |
| C     | 10            | -0.18633000   |
| C     | 11            | -0.57783000   |
| C     | 12            | -0.16200000   |
| C     | 13            | 0.23821000    |
| C     | 14            | -0.03039000   |
| C     | 15            | -0.57731000   |
| C     | 16            | -0.16743000   |
| C     | 17            | -0.32892000   |
| C     | 18            | 0.31838000    |
| C     | 19            | -0.17272000   |
| C     | 20            | 0.08573000    |
| C     | 21            | -0.22986000   |
| C     | 22            | -0.21621000   |
| C     | 23            | -0.02464000   |
| H     | 24            | 0.22251000    |
| H     | 25            | 0.19463000    |
| H     | 26            | 0.18828000    |
| H     | 27            | 0.19660000    |
| H     | 28            | 0.19211000    |
| H     | 29            | 0.17027000    |
| H     | 30            | 0.19004000    |
| H     | 31            | 0.37474000    |
| H     | 32            | 0.15762000    |
| H     | 33            | 0.19695000    |
| H     | 34            | 0.19412000    |
| H     | 35            | 0.21104000    |
| H     | 36            | 0.20929000    |
| H     | 37            | 0.16159000    |
| H     | 38            | 0.18830000    |
| H     | 39            | 0.14672000    |
| H     | 40            | 0.18693000    |
| H     | 41            | 0.19100000    |

|   |    |            |
|---|----|------------|
| H | 42 | 0.20222000 |
| H | 43 | 0.19977000 |
| H | 44 | 0.21057000 |
| H | 45 | 0.18948000 |
| H | 46 | 0.18184000 |
| H | 47 | 0.23200000 |
| H | 48 | 0.21843000 |
| H | 49 | 0.44620000 |

---
